# Supplementary material for: Comparison of long-term outcomes between minimally invasive pulmonary resection combined with and without video-assisted mediastinoscopic lymphadenectomy for left-sided lung cancer
Source: Research Square preprint supplement (doi:10.21203/rs.3.rs-109409/v1), 2020-12-02
Supplement: Supplementary file 2 [file 2145028bdd1a305c7b678923.docx]

Supplementary Table 1. Perioperative profiles inf patients with borderline pulmonary function (n= 59)

| **Variable** | VATS  (n=36) | VATS+VAMLA  (n=23) | *P* value |
| --- | --- | --- | --- |
| **Age (year)** | 67.6 ± 7.0 | 66.1 ± 7.2 | .424 |
| **Sex (male)** | 32 (88.9) | 20 (87.0) | 1.000 |
| **History of smoking** | 32 (88.9) | 19 (82.6) | .699 |
| **Comorbidities per patient (n)** |  |  |  |
| 0 | 13 (36.1) | 7 (30.4) | .780 |
| 1 | 13 (36.1) | 8 (34.8) | 1.000 |
| 2 | 7 (19.4) | 7 (30.4) | .363 |
| ≥ 3 | 3 (8.4) | 1 (4.4) | 1.000 |
| **History of pulmonary Tbc** | 7 (19.4) | 3 (13.0) | .726 |
| **Pulmonary function** |  |  |  |
| FEV1 (%) | 67.4 ± 17.6 | 66.1 ± 16.63 | .678 |
| DLCO (%) | 63.0 ± 18.2 | 66.4 ± 15.2 | .439 |
| **Tumor Location** |  |  | .061 |
| Left upper | 21 (58.3) | 7 (30.4) |  |
| Left lower | 15 (41.7) | 16 (69.6) |  |
| **Surgical extent** |  |  | 1.000 |
| Segmentectomy | 6 (16.7) | 3 (13.0) |  |
| Lobectomy | 30 (83.3) | 20 (87.0) |  |
| **Resection margins** |  |  | 1.000 |
| Complete | 35 (97.2) | 22 (95.7) |  |
| Incomplete | 1 (2.8) | 1 (4.3) |  |
| **Pathological tumor size (mm)** | 32.8 ± 15.7 | 30.8 ± 15.1 | .619 |
| **Histology** |  |  |  |
| ADC | 18 (50.0) | 12 (52.2) | 1.000 |
| SqCC | 14 (38.9) | 10 (43.5) | .790 |
| Others | 4 (11.1) | 1 (4.5) | .639 |
| **8th pathological T factor** |  |  |  |
| pT1 | 14 (38.9) | 10 (43.5) | .790 |
| pT2 | 16 (44.4) | 10 (43.5) | 1.000 |
| pT3 | 5 (13.9) | 2 (8.6) | .694 |
| pT4 | 1 (2.8) | 1 (4.3) | 1.000 |
| **8th pathological N factor** |  |  |  |
| pN0 | 28 (77.8) | 18 (78.3) | 1.000 |
| pN1 | 5 (13.9) | 3 (13.0) | 1.000 |
| pN2 | 3 (8.3) | 2 (8.7) | 1.000 |
| **8th pathological stage** |  |  |  |
| I | 20 (55.6) | 14 (60.9) | .790 |
| II | 12 (33.3) | 6 (26.1) | .773 |
| III | 4 (11.1) | 3 (13.0) | 1.000 |
| **Adjuvant chemotherapy** | 8 (22.2) | 5 (21.7) | 1.000 |
| **Adjuvant radiotherapy** | 3 (8.3) | 2 (8.7) | 1.000 |
| **Mean no. of harvested lymph nodes** | 19.4 ± 5.1 | 31.2 ± 14.3 | .002 |
| **Mean no. of harvested node stations** | 6.4 ± 1.21 | 7.7 ± 1.54 | <.001 |
| **Mean no. of positive LN** | 0.6 ± 1.6 | 0.7 ± 1.8 | .718 |
| **Mean operation time, VATS, minutes** | 125.0 ± 25.6 | 113.2 ± 37.8 | .183 |
| **Mean procedural time, VAMLA, minutes** |  | 36.6 ± 11.5 |  |

Data presented as n (%) unless otherwise noted. VATS, video-assisted thoracoscopic surgery; VAMLA, video-assisted mediastinal lymphadenectomy; SMD, standardized mean difference; Tbc, tuberculosis; FEV1, forced expiratory volume during the first second; DLCO, diffusing capacity of carbon monoxide; ADC, adenocarcinoma; SqCC, squamous cell carcinoma.
